# Supplementary material for: Foliar Sprayed Green Zinc Oxide Nanoparticles Mitigate Drought-Induced Oxidative Stress in Tomato
Source: MDPI journal article supplement (doi:10.3390/plants10112400), 2021-11-07
Supplement: s1 [file s1]

**Table S1: Tests of Between-Subjects Effects (Two-Way ANOVA) on Shoot and Root FW and DW****Shoot FW**

| Source                 | Type III Sum of Squares | df | Mean Square | F         | Sig. |
|------------------------|-------------------------|----|-------------|-----------|------|
| Corrected Model        | 149.120 <sup>a</sup>    | 15 | 9.941       | 80.072    | .000 |
| Intercept              | 4183.760                | 1  | 4183.760    | 33697.700 | .000 |
| Water levels           | 48.995                  | 3  | 16.332      | 131.541   | .000 |
| ZnO-NPs                | 62.288                  | 3  | 20.763      | 167.230   | .000 |
| Water levels * ZnO-NPs | 37.838                  | 9  | 4.204       | 33.862    | .000 |
| Error                  | 3.973                   | 32 | .124        |           |      |
| Total                  | 4336.854                | 48 |             |           |      |
| Corrected Total        | 153.093                 | 47 |             |           |      |

**Shoot DW**

|                        |                     |    |         |            |      |
|------------------------|---------------------|----|---------|------------|------|
| Corrected Model        | 31.484 <sup>a</sup> | 15 | 2.099   | 3727.603   | .000 |
| Intercept              | 154.998             | 1  | 154.998 | 275267.316 | .000 |
| Water levels           | .843                | 3  | .281    | 499.114    | .000 |
| ZnO-NPs                | 24.833              | 3  | 8.278   | 14700.417  | .000 |
| Water levels * ZnO-NPs | 5.808               | 9  | .645    | 1146.161   | .000 |
| Error                  | .018                | 32 | .001    |            |      |
| Total                  | 186.501             | 48 |         |            |      |
| Corrected Total        | 31.502              | 47 |         |            |      |

**Root FW**

|                        |                     |    |        |           |      |
|------------------------|---------------------|----|--------|-----------|------|
| Corrected Model        | 16.071 <sup>a</sup> | 15 | 1.071  | 2999.734  | .000 |
| Intercept              | 15.148              | 1  | 15.148 | 42411.994 | .000 |
| Water levels           | 1.393               | 3  | .464   | 1299.919  | .000 |
| ZnO-NPs                | 10.530              | 3  | 3.510  | 9827.617  | .000 |
| Water levels * ZnO-NPs | 4.148               | 9  | .461   | 1290.378  | .000 |
| Error                  | .011                | 32 | .000   |           |      |
| Total                  | 31.231              | 48 |        |           |      |
| Corrected Total        | 16.083              | 47 |        |           |      |

**Root DW**

|                        |                     |    |          |            |      |
|------------------------|---------------------|----|----------|------------|------|
| Corrected Model        | 11.557 <sup>a</sup> | 15 | .770     | 67364.548  | .000 |
| Intercept              | 2.254               | 1  | 2.254    | 197050.639 | .000 |
| Water levels           | 2.436               | 3  | .812     | 70990.365  | .000 |
| ZnO-NPs                | 2.317               | 3  | .772     | 67517.457  | .000 |
| Water levels * ZnO-NPs | 6.805               | 9  | .756     | 66104.973  | .000 |
| Error                  | .000                | 32 | 1.144E-5 |            |      |
| Total                  | 13.811              | 48 |          |            |      |
| Corrected Total        | 11.558              | 47 |          |            |      |

**Table S2: Tests of Between-Subjects Effects (Two-Way ANOVA) on Stress Indicators****MDA**

| Source                 | Type III Sum of Squares | df | Mean Square | F         | Sig. |
|------------------------|-------------------------|----|-------------|-----------|------|
| Corrected Model        | 4374.181 <sup>a</sup>   | 15 | 291.612     | 116.116   | .000 |
| Intercept              | 105492.340              | 1  | 105492.340  | 42005.703 | .000 |
| Water levels           | 1827.889                | 3  | 609.296     | 242.614   | .000 |
| ZnO-NPs                | 1873.745                | 3  | 624.582     | 248.700   | .000 |
| Water levels * ZnO-NPs | 672.547                 | 9  | 74.727      | 29.756    | .000 |
| Error                  | 80.364                  | 32 | 2.511       |           |      |
| Total                  | 109946.885              | 48 |             |           |      |
| Corrected Total        | 4454.545                | 47 |             |           |      |

**H2O2**

|                        |                      |    |          |           |      |
|------------------------|----------------------|----|----------|-----------|------|
| Corrected Model        | 434.529 <sup>a</sup> | 15 | 28.969   | 278.658   | .000 |
| Intercept              | 1242.805             | 1  | 1242.805 | 11954.930 | .000 |
| Water levels           | 163.568              | 3  | 54.523   | 524.470   | .000 |
| ZnO-NPs                | 189.196              | 3  | 63.065   | 606.646   | .000 |
| Water levels * ZnO-NPs | 81.764               | 9  | 9.085    | 87.391    | .000 |
| Error                  | 3.327                | 32 | .104     |           |      |
| Total                  | 1680.661             | 48 |          |           |      |
| Corrected Total        | 437.855              | 47 |          |           |      |

<sup>a</sup>. R Squared = .999 (Adjusted R Squared = .999)

**Table S3: Tests of Between-Subjects Effects (Two-Way ANOVA) on Antioxidants****ASA**

| Source                 | Type III Sum of Squares | df | Mean Square | F         | Sig. |
|------------------------|-------------------------|----|-------------|-----------|------|
| Corrected Model        | 2.133 <sup>a</sup>      | 15 | .142        | 602.277   | .000 |
| Intercept              | 11.207                  | 1  | 11.207      | 47460.088 | .000 |
| Water levels           | .096                    | 3  | .032        | 135.297   | .000 |
| ZnO-NPs                | 1.775                   | 3  | .592        | 2505.654  | .000 |
| Water levels * ZnO-NPs | .262                    | 9  | .029        | 123.479   | .000 |
| Error                  | .008                    | 32 | .000        |           |      |
| Total                  | 13.348                  | 48 |             |           |      |
| Corrected Total        | 2.141                   | 47 |             |           |      |

**Free Phenols**

|                        |                      |    |           |           |      |
|------------------------|----------------------|----|-----------|-----------|------|
| Corrected Model        | 853.512 <sup>a</sup> | 15 | 56.901    | 402.423   | .000 |
| Intercept              | 10004.031            | 1  | 10004.031 | 70752.167 | .000 |
| Water levels           | 341.951              | 3  | 113.984   | 806.133   | .000 |
| ZnO-NPs                | 418.541              | 3  | 139.514   | 986.692   | .000 |
| Water levels * ZnO-NPs | 93.021               | 9  | 10.336    | 73.097    | .000 |
| Error                  | 4.525                | 32 | .141      |           |      |
| Total                  | 10862.068            | 48 |           |           |      |
| Corrected Total        | 858.037              | 47 |           |           |      |

<sup>a</sup>. R Squared = .999 (Adjusted R Squared = .999)

**Table S4: Tests of Between-Subjects Effects (Two-Way ANOVA) on Antioxidant Enzymes****SOD**

| Source                 | Type III Sum of Squares | df | Mean Square | F          | Sig. |
|------------------------|-------------------------|----|-------------|------------|------|
| Corrected Model        | 4.083 <sup>a</sup>      | 15 | .272        | 4360.448   | .000 |
| Intercept              | 18.710                  | 1  | 18.710      | 299704.807 | .000 |
| Water levels           | .104                    | 3  | .035        | 553.948    | .000 |
| ZnO-NPs                | 3.272                   | 3  | 1.091       | 17471.503  | .000 |
| Water levels * ZnO-NPs | .707                    | 9  | .079        | 1258.930   | .000 |
| Error                  | .002                    | 32 | 6.243E-5    |            |      |
| Total                  | 22.795                  | 48 |             |            |      |
| Corrected Total        | 4.085                   | 47 |             |            |      |

**CAT**

|                        |                     |    |         |            |      |
|------------------------|---------------------|----|---------|------------|------|
| Corrected Model        | 59.619 <sup>a</sup> | 15 | 3.975   | 2808.574   | .000 |
| Intercept              | 237.062             | 1  | 237.062 | 167515.055 | .000 |
| Water levels           | .395                | 3  | .132    | 93.094     | .000 |
| ZnO-NPs                | 53.400              | 3  | 17.800  | 12577.923  | .000 |
| Water levels * ZnO-NPs | 5.824               | 9  | .647    | 457.284    | .000 |
| Error                  | .045                | 32 | .001    |            |      |
| Total                  | 296.726             | 48 |         |            |      |
| Corrected Total        | 59.664              | 47 |         |            |      |

**APX**

|                        |                   |    |          |           |      |
|------------------------|-------------------|----|----------|-----------|------|
| Corrected Model        | .239 <sup>a</sup> | 15 | .016     | 607.337   | .000 |
| Intercept              | 1.306             | 1  | 1.306    | 49839.364 | .000 |
| Water levels           | .005              | 3  | .002     | 63.436    | .000 |
| ZnO-NPs                | .194              | 3  | .065     | 2473.047  | .000 |
| Water levels * ZnO-NPs | .039              | 9  | .004     | 166.734   | .000 |
| Error                  | .001              | 32 | 2.621E-5 |           |      |
| Total                  | 1.546             | 48 |          |           |      |
| Corrected Model        | .239 <sup>a</sup> | 15 | .016     | 607.337   | .000 |

<sup>a</sup>. R Squared = .999 (Adjusted R Squared = .999)
